# Supplementary material
Source: Royal Society of Chemistry journal article supplement (doi:10.1039/d6cp00855k)
Supplement: d6cp00855k1.pdf [file d6cp00855k1.pdf]

# Synergistic Effects of K-Atom Rattling, Anisotropy, and Antibonding States on High Thermoelectric Performance in $\text{KAuSe}_2$

Jiayao Wang,<sup>†</sup> Luman Shang,<sup>†</sup> Shuming Zeng,<sup>‡</sup> Yu Wu,<sup>\*,†</sup> and Chenhan Liu<sup>\*,†</sup>

<sup>†</sup>*Advanced Thermal Management Technology and Functional Materials Laboratory,  
Ministry of Education Key Laboratory of NSLSCS, School of Energy and Mechanical  
Engineering, Nanjing Normal University, Nanjing 210023, P. R. China*

<sup>‡</sup>*College of Physics Science and Technology, Yangzhou University, Jiangsu, Yangzhou  
225009, China*

E-mail: wuyu@njnu.edu.cn; chenhanliu@njnu.edu.cn

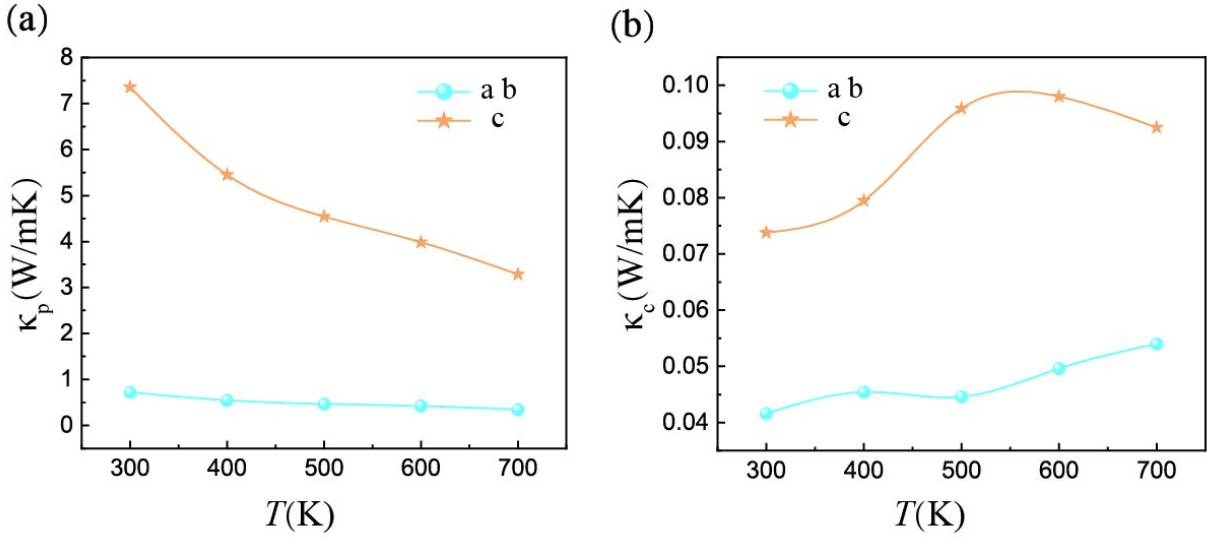

Figure 1: Calculated temperature-dependent (a) $\kappa_p$  , (b) $\kappa_c$  considering 3+4ph scattering along different directions.

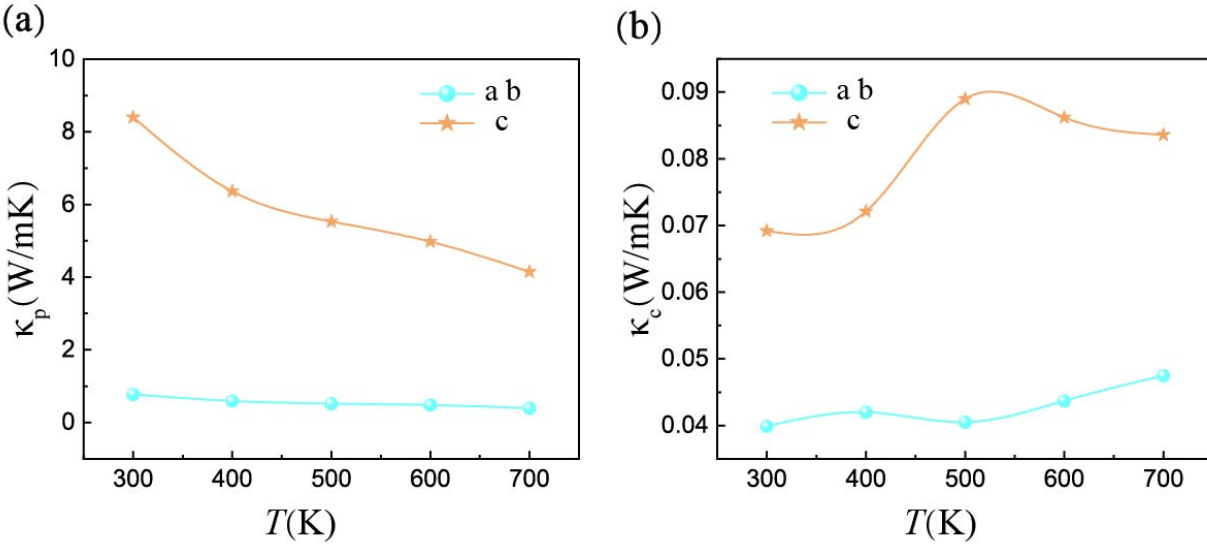

Figure 2: Calculated temperature-dependent (a) $\kappa_p$  , (b) $\kappa_c$  considering 3ph scattering along different directions.

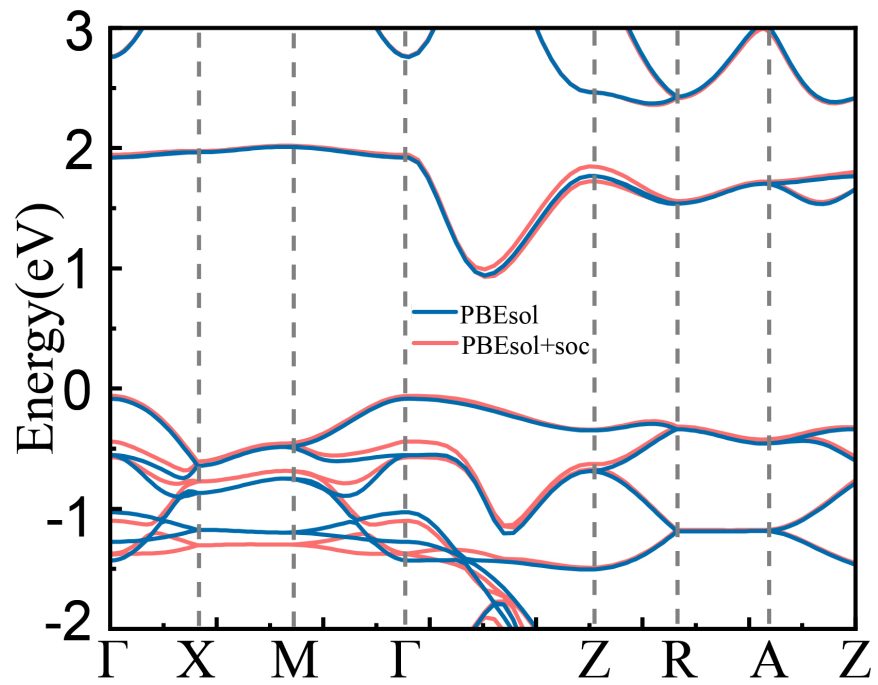

Figure 3: Comparison of PBEsol (blue line) and PBEsol+SOC (red line) electronic band structures.
